# Supplementary material for: IL-6 and Akt are involved in muscular pathogenesis in myasthenia gravis
Source: Acta Neuropathol Commun. 2015 Jan 15;3:1. doi: 10.1186/s40478-014-0179-6 (PMC4308930; doi:10.1186/s40478-014-0179-6)
Supplement: Additional file 1: Table S1. — Deregulated genes for the IGF-I and IL-6 pathways. Among the genes described in the IGF-I pathway, 20 were deregulated in MG patients, and 12 in EAMG rats. Concerning the IL-6 pathway, 13 genes were deregulated in patients and 13 in rats. Highlighted genes are common between the two pathways. [file 40478_2014_179_MOESM1_ESM.docx]

**Additional file 1: Table S1: Deregulated genes for the IGF-I and IL-6 pathway**

Among the genes described in the IGF-I pathway, 20 were deregulated in MG patients, and 12 in EAMG rats. Concerning the IL-6 pathway, 13 genes were deregulated in patient, 13 in rats. Highlighted genes are common between the two pathways.

| IGF-1 pathway | |  |
| --- | --- | --- |
|  |  |  |
|  | Human transcriptome | Rat transcriptome |
| Up | JUN | Eif4ebp1 |
| XBP1 | NfkbIa |
| MAP2K4 |  |
| IGF1R |  |
| MAP4K4 |  |
| REG1P |  |
| SOS2 |  |
| SLC2A4 |  |
| PRKCQ |  |
| RPS6KA3 |  |
| GRB2 |  |
| EGR1 |  |
| PFKL |  |
| FOS |  |
| PIK3R1 |  |
| BTK |  |
| Down | MAP4K5 | Egr1 |
| RPS6KA2 | Fos |
| INPPL1 | Rrad |
| CASP9 | Hras |
|  | Rps6kb1 |
|  | Map2k6 |
|  | Raf1 |
|  | Jun |
|  | Ccnd1 |
|  | Fkbp1a |
|  |  |  |
|  |  |  |
| IL-6 pathway | |  |
|  |  |  |
|  | Human transcriptome | Rat transcriptome |
| Up | JUNB | Il6ra |
| MAP2K4 | Crp |
| IL6ST | Jak2 |
| GRB2 | Cebpd |
| PIK3R1 | Cebpb |
| TNFSF10 | NfkbIa |
| JUN |  |
| NR3C1 |  |
| FOS |  |
| SOS1 |  |
| SOS2 |  |
| Down | A2M | Rps6kb1 |
| TIMP1 | Met |
|  | Ccl2 |
|  | Jun |
|  | Raf1 |
|  | Fos |
|  | Hras |
